# Supplementary material for: Aurisin A Complexed with 2,6-Di-O-methyl-β-cyclodextrin Enhances Aqueous Solubility, Thermal Stability, and Antiproliferative Activity against Lung Cancer Cells
Source: MDPI journal article supplement (doi:10.3390/ijms23179776), 2022-08-29
Supplement: s1 [file s1]

# Aurisin A Complexed with 2,6-di-O-methyl- $\beta$ -cyclodextrin Enhances Aqueous Solubility, Thermal Stability, and Antiproliferative Activity against Lung Cancer Cells

Thanapon Charoenwongpaiboon <sup>1</sup>, Amy Oo <sup>2</sup>, Sutita Nasoontorn <sup>3</sup>, Thanyada Rungrotmongkol <sup>2,4</sup>, Somdej Kanokmedhakul <sup>5</sup> and Panupong Mahalapbutr <sup>3,\*</sup>

<sup>1</sup> Department of Chemistry, Faculty of Science, Silpakorn University, Nakhon Pathom 73000, Thailand

<sup>2</sup> Center of Excellence in Structural and Computational Biology, Department of Biochemistry, Chulalongkorn University, Bangkok 10330, Thailand

<sup>3</sup> Department of Biochemistry, Center for Translational Medicine, Faculty of Medicine, Khon Kaen University, Khon Kaen 40002, Thailand

<sup>4</sup> Ph.D. Program in Bioinformatics and Computational Biology, Graduate School, Chulalongkorn University, Bangkok 10330, Thailand

<sup>5</sup> Natural Products Research Unit, Department of Chemistry and Center for Innovation in Chemistry, Faculty of Science, Khon Kaen University, Khon Kaen 40002, Thailand

\* Correspondence: panupma@kku.ac.th

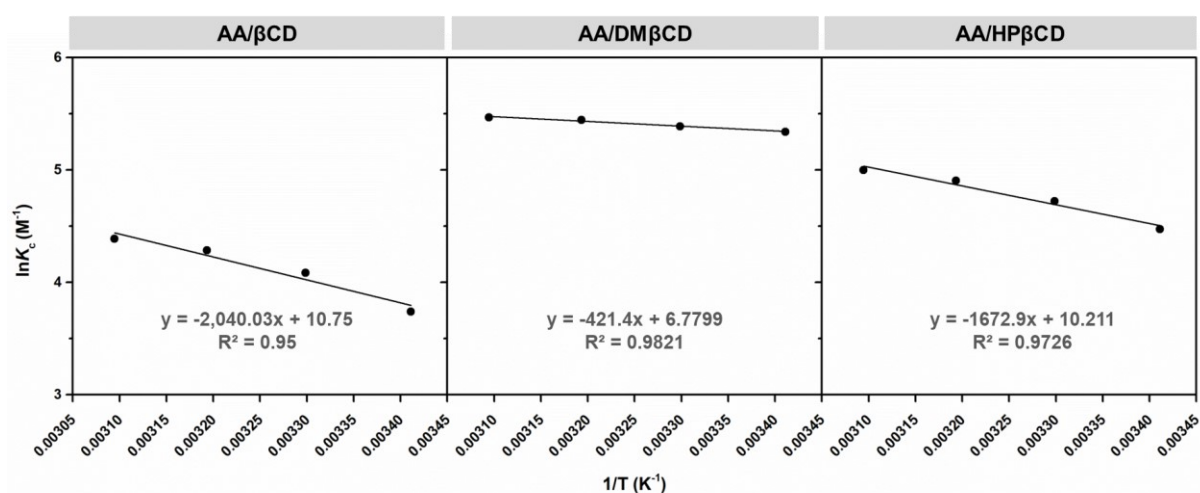

Figure S1. Van't Hoff plots of AA/βCDs inclusion complexes.
